# Supplementary material
Source: PubMed Central journal article supplement (PMC5785441)
Supplement: NIHMS921762-supplement-Supplemental_Digital_Content.pdf [file NIHMS921762-supplement-Supplemental_Digital_Content.pdf]

## Appendix 1.

Group Information: The following institutions and researchers compose the Nulliparous Pregnancy Outcomes Study: Monitoring Mothers-to-be (nuMoM2b) Network: CaseWestern Reserve University/Ohio State University: Brian M. Mercer, MD, Jay Iams, MD, Wendy Dalton, RN, Cheryl Latimer, RN, LuAnn Polito, RN, JD; Columbia University/Christiana Care: Matthew K. Hoffman, MD, MPH, Ronald Wapner, MD, Karin Fuchs, MD, Caroline Torres, MD, Stephanie Lynch, RN, BSN, CCRC, Ameneh Onativia, MD, Michelle DiVito, MSN, CCRC; Indiana University: David M. Haas, MD,MS, Tatiana Foroud, PhD, Emily Perkins, BS,MA, CCRP, Shannon Barnes, RN, MSN, Alicia Winters, BS, Catherine L. McCormick, RN; University of Pittsburgh: Hyagriv N. Simhan, MD, MSCR, Steve N. Caritis, MD, Melissa Bickus, RN, BS, Paul D. Speer, MD, Stephen P. Emery, MD, Ashi R. Daftary, MD; Northwestern University: William A. Grobman, MD, MBA, Alan M. Peaceman, MD, Peggy Campbell, RN, BSN, CCRC, Jessica S. Shepard, MPH, Crystal N. Williams, BA; University of California at Irvine: Deborah A. Wing, MD, Pathik D. Wadhwa, MD, PhD, Michael P. Nageotte, MD, Pamela J. Rumney, RNC, CCRC, Manuel Porto, MD, Valerie Pham, RDMS; University of Pennsylvania: Samuel Parry, MD, Jack Ludmir, MD, Michal Elovitz, MD, Mary Peters, BA, MPH, Brittany Araujo, BS; University of Utah: Robert M. Silver, MD, M. Sean Esplin, MD, Kelly Vorwaller, RN, Julie Postma, RN, Valerie Morby, RN, Melanie Williams, RN, Linda Meadows, RN; RTI International: Corette B. Parker, DrPH, Matthew A. Koch, MD, PhD, Deborah W. McFadden, MBA, Barbara V. Alexander, MSPH, Venkat Yetukuri, MS, Shannon Hunter, MS, Tommy E. Holder Jr, BS, Holly L. Franklin, MPH, Martha J. DeCain, BS, Christopher Griggs, BS; Eunice Kennedy Shriver National Institute of Child Health and Human Development: Uma M. Reddy, MD, MPH, Marian Willinger, PhD, Maurice Davis, DHA, MPA, MHSA; University of Texas Medical Branch at Galveston: George R. Saade, MD.

Grobman WA, Parker CB, Willinger M, Wing DA, Silver RM, Wapner RJ, et al. Racial disparities in adverse pregnancy outcomes and psychosocial stress. *Obstet Gynecol* 2018; 131.

The authors provided this information as a supplement to their article.

©2018 American College of Obstetricians and Gynecologists.
